# Supplementary material
Source: PubMed Central journal article supplement (PMC3571317)
Supplement: JB.01875-12_zjb999092434so1.pdf [file JB.01875-12_zjb999092434so1.pdf]

## Online Supplemental material

**Fig. S1** Multiple sequence alignment (T-coffee) of different members of the IdeS family.

**Fig. S2** IdeSsuis is recognized by rIdeSsuis\_homologue (A) and rIdeSsuis\_C\_domain (B) specific antisera.

**Fig. S3** Detection of IdeSsuis on the surface of *S. suis* wt (strain 10, serotype 2) in flow cytometry.

**Fig. S4** rIdeSsuis and rIdeSsuis\_homologue cleave IgM from pigs (A) but not IgM from humans (B), mice (C) and warthogs (D).

**Fig. S5** Recombinant IdeSsuis does not cleave porcine IgG.

**Fig. S6** Cleavage of purified porcine IgM by rIdeSsuis and supernatant of *S. suis* serotype 2 (strain 10, wt).

**Fig. S7** IdeSsuis in culture supernatants cleaves IgM in colostrum.

**Fig. S8** IdeSsuis in culture supernatants and rIdeSsuis cleave IgM from wild boars (A) but not bovine (B), feline (C) or canine (D) IgM.

**Fig. S9** IdeSsuis cleaves IgM bound to the bacterial surface.

**Table S1** Oligonucleotide primer sequences used in this study.

**Table S2** Antibodies used in Western blot analysis.

Cedric Notredame

CPU TIME:1 sec.

SCORE=77

\*

BAD AVG GOOD

\*

IdeS : 78
IdeE : 78
IdeE2 : 78
IdeZ : 79
IdeSsuis : 73
cons : 77

IdeS mrkrc-yst-----saavlaavtlf--vlsvdrgv-
IdeE mktia-ypn--kp---hslsaglltaiaif--slassnit-
IdeE2 mmkkqsftksrkpkfgmrklsig-lascmlgmmflttghvsg
IdeZ ml-----gmmflttshvsg
IdeSsuis mniqerfsl-----rksavg-lvsvsllc-aiytstvaa

cons \* : .

IdeS -----iads--
IdeE -----yadd--
IdeE2 e--vvevwpngqnpngkieilsqtehseh-----
IdeZ e--vvevwpypgqnpngkteilsqtedses-----
IdeSsuis dtvvtgvnieiesqvkdevsieeknesldgsnieiveeia

cons

IdeS -----fsan-----
IdeE -----yqrn-----
IdeE2 -----lqklrdiedfq-----
IdeZ -----sqrlrdiedfq-----
IdeSsuis dnipspviaegevavemkvdrktenvvsrndtevttsseqnqi

cons .

IdeS -----qeirysevtpyhvtsvwtkgvtpa--n--ft
IdeE -----ateayakevphqitsvwtkgvtppltpeq--fr
IdeE2 -----aqkqadhvrytkwldgvtvdehe--fr
IdeZ -----aekkmqnvvytkwldgvdvkdhd--fr
IdeSsuis evtetkeilnqtsyqtesgeqrqiawahgitppameqsggfv

cons \* . \* : \*

IdeS ---qg-edvfhapyvanqgwyditktfngk--ddllcgaata
IdeE ---ynnedvihapylahqgwyditkafdkg--dnllcgaata
IdeE2 kikeydteyyvtplllsgkgyydinkdfng--dsdkcaaava
IdeZ kivdgniayyatplllngrgyfdinkdfnr--dsdkcaaava
IdeSsuis kekygdylnytapfeagkgyydtknslnasfidlnlcfaavs

cons : \* : \* : \* . \* : \* \* \* . :

IdeS gnmhwwfdqnkdqikryleehpekqkinf-ngeqmfdvkea  
IdeE gnmhwwfdqnkteieaylskhpekqiif-nngelfdlkaa  
IdeE2 anmfhywfdrrndsirflsqspgengviklenektievskf  
IdeZ anmfhywldinrdnvdrrflrqnpekhgiel-pdgqlklsdf  
IdeSsuis snmvhwwlegnssyverylkekkgtvvnv-e-enyaitdlrry

cons .\*\*.\*:\*\*\*: \* : . : \* : : . : . : . : . :

IdeS idtknhqldsklfeyfkekapylstkhlg-vfpdhvidmfi  
IdeE idtkdsqtnsqlfnyfrdkafpnlsarqlg-vmpdlvldmfi  
IdeE2 letyrsgdyld----kspffdlisnsfkgpvwanklldayi  
IdeZ lntyeshgyrd----ksklfdfisnfnngpvwtcklldnyi  
IdeSsuis insfqngqnsrvfdmfkt---yygyrtng-fvsdalvdlfi

cons :: : . : : : : . \* . . : : \* : \*

IdeS ngyrlsltnhgptpvke--gskdprggifdavftrgdqskll  
IdeE ngyylnvfktqstdvnrrpyqdkdkrggifdavftrgdqsttll  
IdeE2 ngygyihkfaknt--phskn-nnskfnnfkkvfdg----nll  
IdeZ ngyaynykygrti--edptk-ntskinnffkevfne----kil  
IdeSsuis ngykpkaggvnl--edsqllvpdsrggffydvfke----kkl

cons \*\*\* : . : \* \* . \*

IdeS tsrhdfkeknlkeisdlikkeltegkalglshyanvr--in  
IdeE tarhdlknkglnndistiikqeltegralalshtyanvs--is  
IdeE2 tdihqifd--yntfsdklsealytgkaiglaygpgdlrrslg  
IdeZ tnnhsirn--qnefsvllsealytgkaiglsygpaglrhslg  
IdeSsuis tnrifsgs--yerfgedvrtvleskgllgltyrtlgy---at

cons \* . : : . : \* : . \* : : .

IdeS hvinlwgadfdnsngnlkaiyvtdsds-----nasigmkkyf  
IdeE hvinlwgadfnagnleaiyvtdsda-----nasigmkkyf  
IdeE2 hiisvvgadlddqnrsvaiyvtdsddkkltignervglkryk  
IdeZ hiisvvgadldadgnvsvaiyvtdsddkkltigdervglkryk  
IdeSsuis hvtvwgaeydnqgkikavyitdsddq-----qeqiglkrmg

cons \* : . : \* \* : : . : \* \* \* \* \* : : \* \* :

IdeS vgvnsagkvaisakeikednigaqvlglftlstgqdswnq--  
IdeE vginahrhvaisakkiegenigaqvlglftlssgkdiwqk--  
IdeE2 vssddqgrarltrd--kdntggeirsietldmgtqewadyf  
IdeZ istddenrlrltaye-ethntggqirglwtldtgkyawadyf  
IdeSsuis itrdsagnprlnnhm-knnsagalldyvhtirlgqdlweeyf

cons : : . : . : . \* . : : \* : \* \* .

IdeS -----  
IdeE -----  
IdeE2 -----  
IdeZ -----  
IdeSsuis n-----k-----  
          dkteqgtgdq-----  
          n-----plakaketasqtladt kkal dlsiqgqselpes  
  
cons       █          █

IdeS -----  
IdeE -----  
IdeE2 -----  
IdeZ -----  
IdeSsuis mrlilylekl n nlynqgilsiqkaessemlsgalenglnslks  
  
cons

IdeS -----  
IdeE -----  
IdeE2 -----  
IdeZ -----  
IdeSsuis ldfpisevgnalapdlpvgrstvsdvds lssqetsstnlea  
  
cons

IdeS -----  
IdeE -----  
IdeE2 -----  
IdeZ -----  
IdeSsuis dtenagiiadgtnqlhfpveaqtts s veaegdnvfeqeadtl  
  
cons

IdeS -----  
IdeE -----  
IdeE2 -----  
IdeZ -----  
IdeSsuis piiienkdefg s elsrnmqtsetd slvaveedvkndevaqv  
  
cons

IdeS -----  
IdeE -----  
IdeE2 -----  
IdeZ -----  
IdeSsuis eellesekvenqssellsdtlivesandkeedrveavvseqp  
  
cons

IdeS -----  
IdeE -----  
IdeE2 -----  
IdeZ -----  
IdeSsuis dsiphqnveislveptnvetetvvtpindaatphgsptyidn

cons

IdeS -----  
IdeE -----  
IdeE2 -----  
IdeZ -----  
IdeSsuis svtesvatplekdsiqageteiaeptsssestnvetetvvtpv

cons

IdeS -----  
IdeE -----  
IdeE2 -----  
IdeZ -----  
IdeSsuis ndvatphgsptyidnsvtesvatplekdsiqageteiaepts

cons

IdeS -----  
IdeE -----  
IdeE2 -----  
IdeZ -----  
IdeSsuis sestnvetetvvtpvndvatphgsptyidnsvtesvatplek

cons

IdeS -----  
IdeE -----  
IdeE2 -----  
IdeZ -----  
IdeSsuis dsiqageteiaeptsssestsveaelvdnseihaatssvtpcg

cons

IdeS -----  
IdeE -----  
IdeE2 -----  
IdeZ -----  
IdeSsuis ssayadgsttesvatplekdsiqtgnteiaeptsskstnvea

cons

```

IdeS      -----
IdeE      -----
IdeE2     -----
IdeZ      -----
IdeSsuis  asvdnseihadasltavssvnlndnpviepvaisligskrdtn

cons

IdeS      -----
IdeE      -----
IdeE2     -----
IdeZ      -----
IdeSsuis  aevevsslskrevrktntdglisvqskvikkellesslaeag

cons

IdeS      -----
IdeE      -----
IdeE2     -----
IdeZ      -----
IdeSsuis  splleatiaqssnsnsteigmsyqntvllesnnterqvskae

cons

IdeS      -----
IdeE      -----
IdeE2     -----
IdeZ      -----
IdeSsuis  ivmehketelvetvssasepvvlvenisqtsnntiesgknmg

cons

IdeS      -----
IdeE      -----
IdeE2     -----
IdeZ      -----
IdeSsuis  vqsqagakqilgveqsskvstptsrqimgvglltlvlgsalg

cons

IdeS      ----- t n
IdeE      ----- l s
IdeE2     ----- t e k
IdeZ      ----- a e q
IdeSsuis  llkk r r k

cons      -----

```

**Fig. S1.** Multiple sequence alignment (T-coffee) of different members of the IdeS family (accession no.): *S. pyogenes* M1 IdeS (Q7DAM2), *S. equi subsp. equi* IdeE (YP\_002746323.1), *S. equi subsp. equi* IdeE2 (ACU12335.1), *S. equi subsp. zooepidemicus* IdeZ (AEJ25107.1) and *S. suis* IdeSsuis (SSU0496).

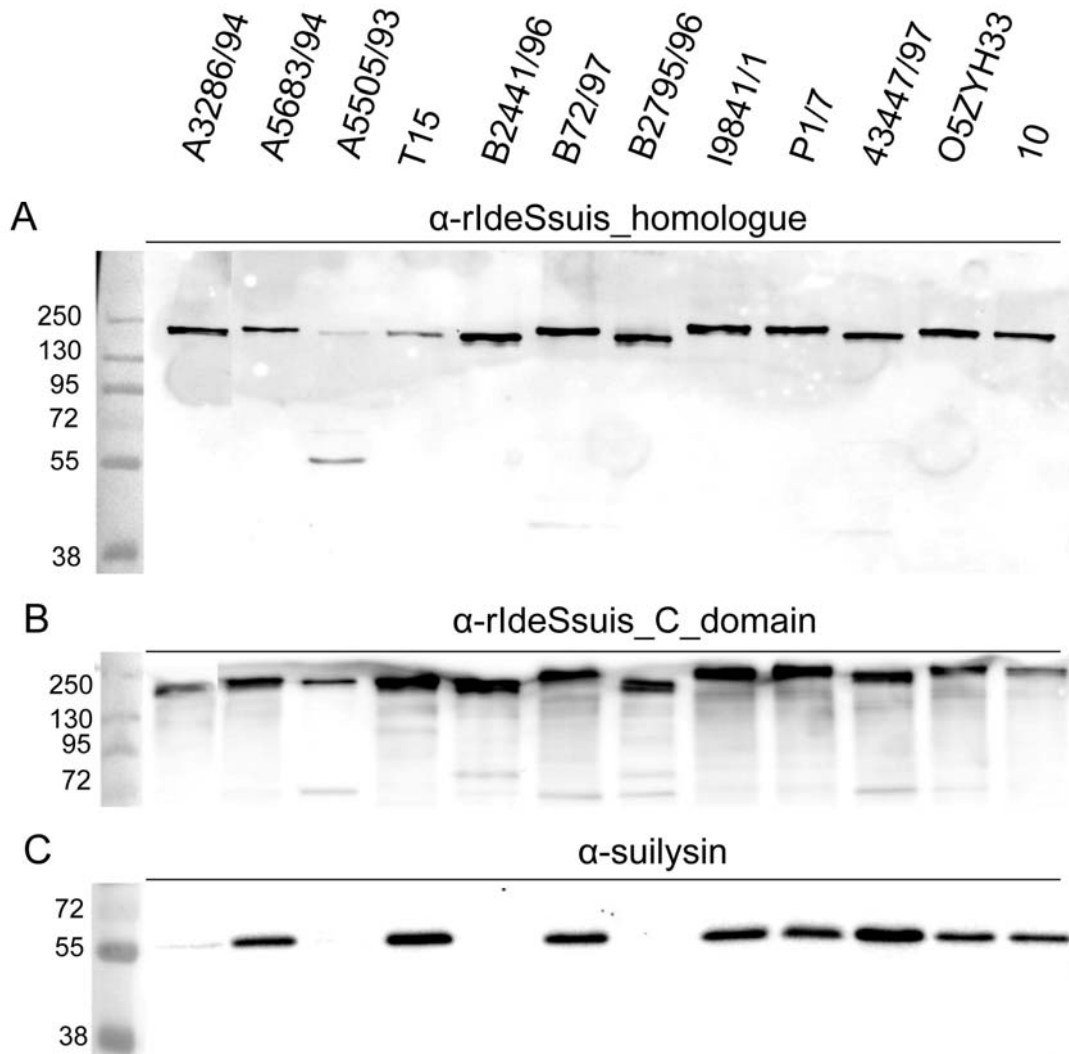

**Fig. S2** IdeSsuis is recognized by rIdeSsuis\_homologue (A) and rIdeSsuis\_C\_domain (B) specific antisera. (A-C) Western blot analysis of 24 fold concentrated culture supernatants of different *S. suis* wildtype strains as indicated at the top after separation of proteins in 10% SDS-PAGE under reducing conditions. (C) As control, supernatants were investigated with an antiserum against suilysin. The marker bands are shown on the left side (sizes in kDa).

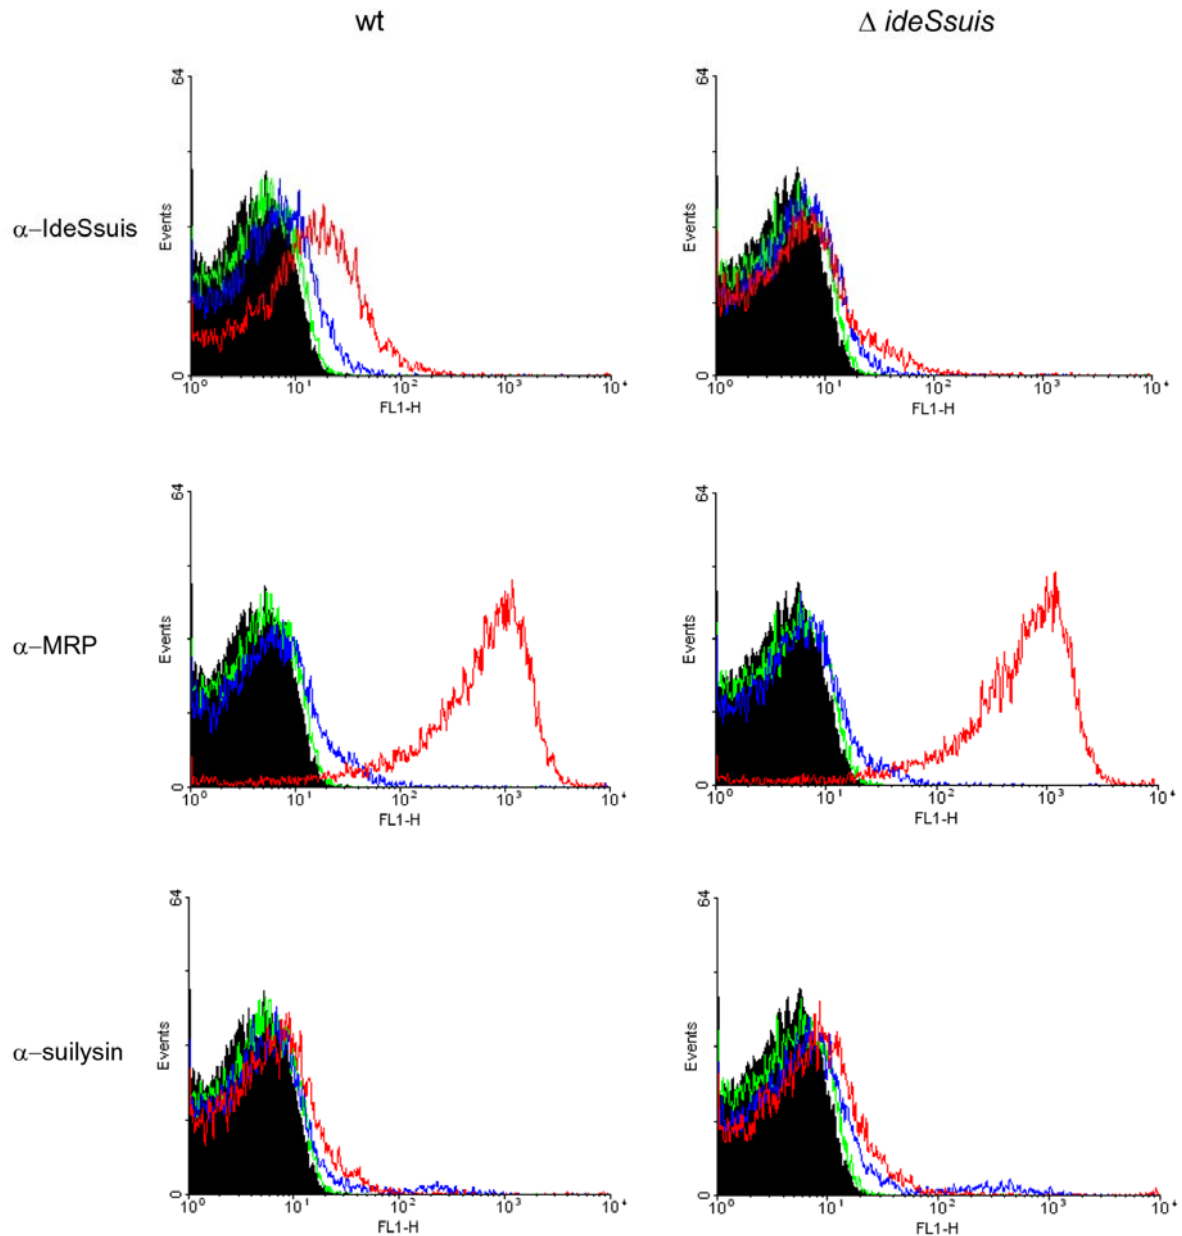

**Fig. S3** Detection of IdeSsuis on the surface of *S. suis* wt (strain 10, serotype 2) in flow cytometry (red line in the upper left panel). For comparison, flow cytometry analysis was also conducted with the isogenic mutant  $10\Delta ideSsuis$  and with  $\alpha$ -MRP (a surface-associated protein) and  $\alpha$ -suilysin (a secreted cytolysin) as indicated. The red line shows the results for the specific rabbit hyperimmune sera, the green line for the control lacking the first antibody and the blue line for the respective rabbit pre immune sera. The panels show representative results of three independent experiments. Differences between strain 10 and the isogenic mutant  $10\Delta ideSsuis$  were significant for  $\alpha$ -IdeSsuis but not for  $\alpha$ -MRP and  $\alpha$ -suilysin ( $p < 0.05$ ).



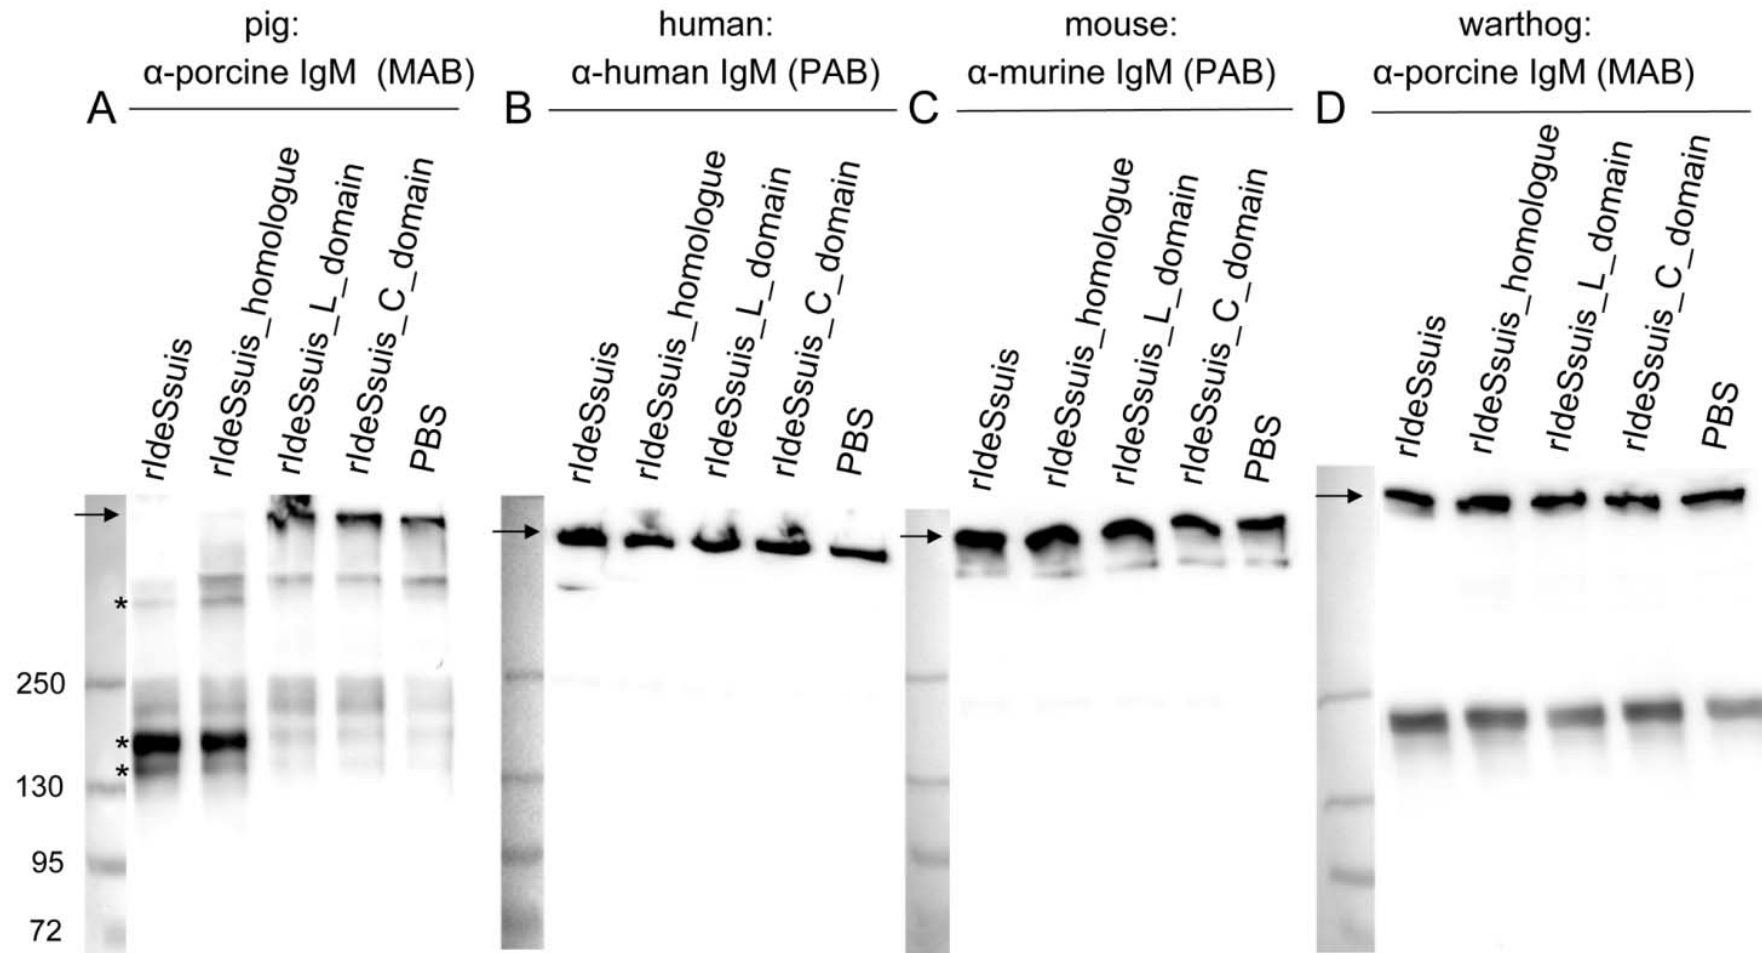

**Fig. S4** *rIdeSsuis* and *rIdeSsuis\_homologue* cleave IgM from pigs (A) but not IgM from humans (B), mice (C) and warthogs (D). Anti-IgM Western blot analysis of diluted plasma or serum from the indicated species incubated as indicated with 5  $\mu$ g/ml of the different *rIdeSsuis* constructs and as control with PBS. The position of the IgM multimer is marked with an arrow on the left side of the blots and the cleavage products of porcine IgM are indicated by asterisks on the left side. The marker bands are shown on the left side (sizes in kDa).

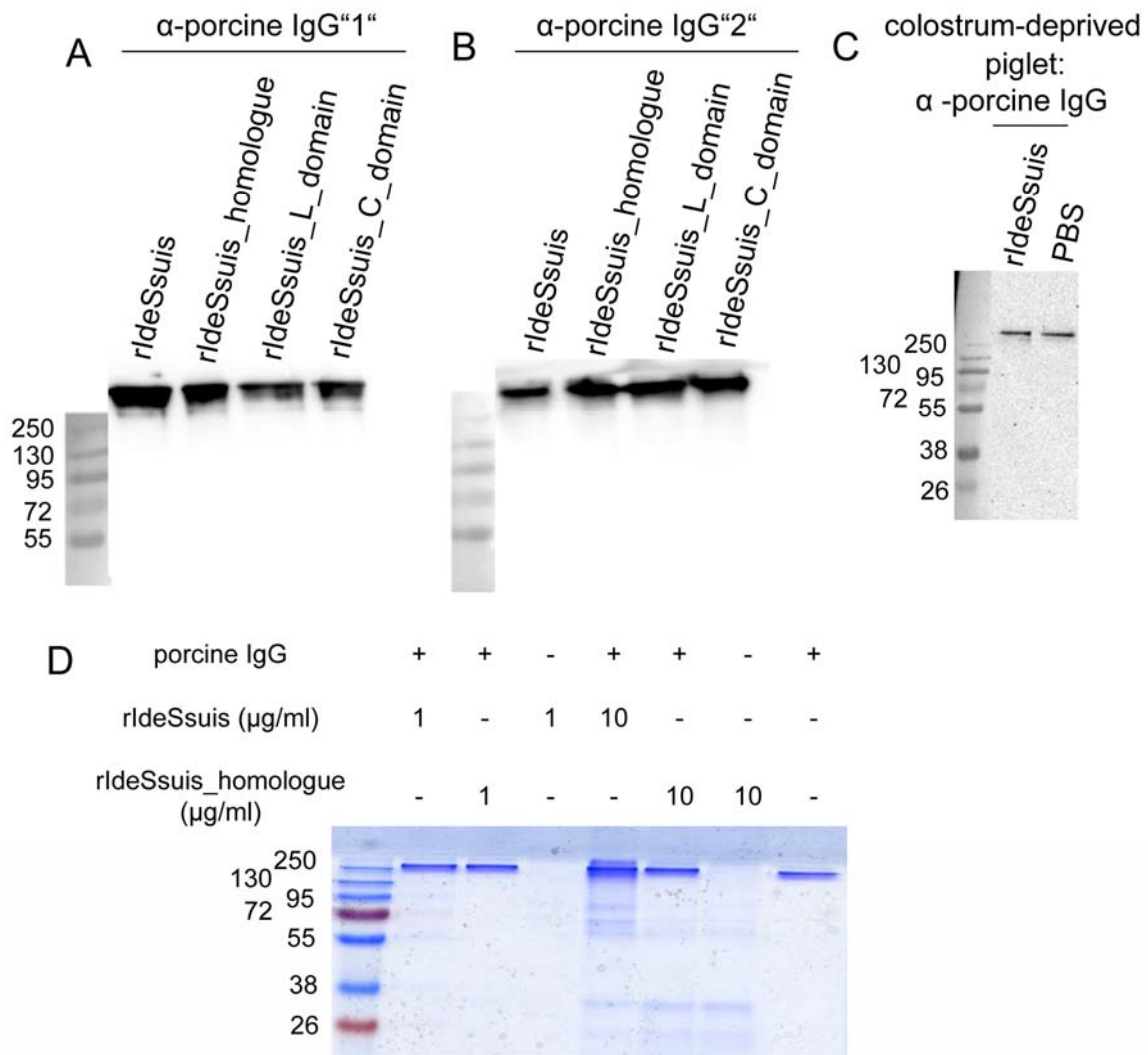

**Fig. S5** Recombinant IdeSsuis does not cleave porcine IgG. (A) Anti-IgG<sup>"1"</sup> and (B) anti-IgG<sup>"2"</sup> Western blot analysis of diluted porcine plasma incubated with 5  $\mu$ g/ml of the different rIdeSsuis constructs as indicated. IgG<sup>"1"</sup> and IgG<sup>"2"</sup> refer to purified porcine IgGs with different biochemical and biological properties (Serotec, personal communication). However, IgG<sup>"1"</sup> or IgG<sup>"2"</sup> do not correspond to the recent definition of porcine IgG subclasses by genomics and transcriptomics (John E. Butler, personal communication). (C) Anti-IgG Western blot analysis (PAB against porcine IgG) of diluted serum from a colostrum-deprived neonatal piglet incubated with 15  $\mu$ g rIdeSsuis (in 750  $\mu$ l) for 3 hours or with PBS as control. (D) Coomassie-stained gel of purified porcine IgGs incubated with rIdeSsuis as indicated. The marker bands are shown on the left side (sizes in kDa).

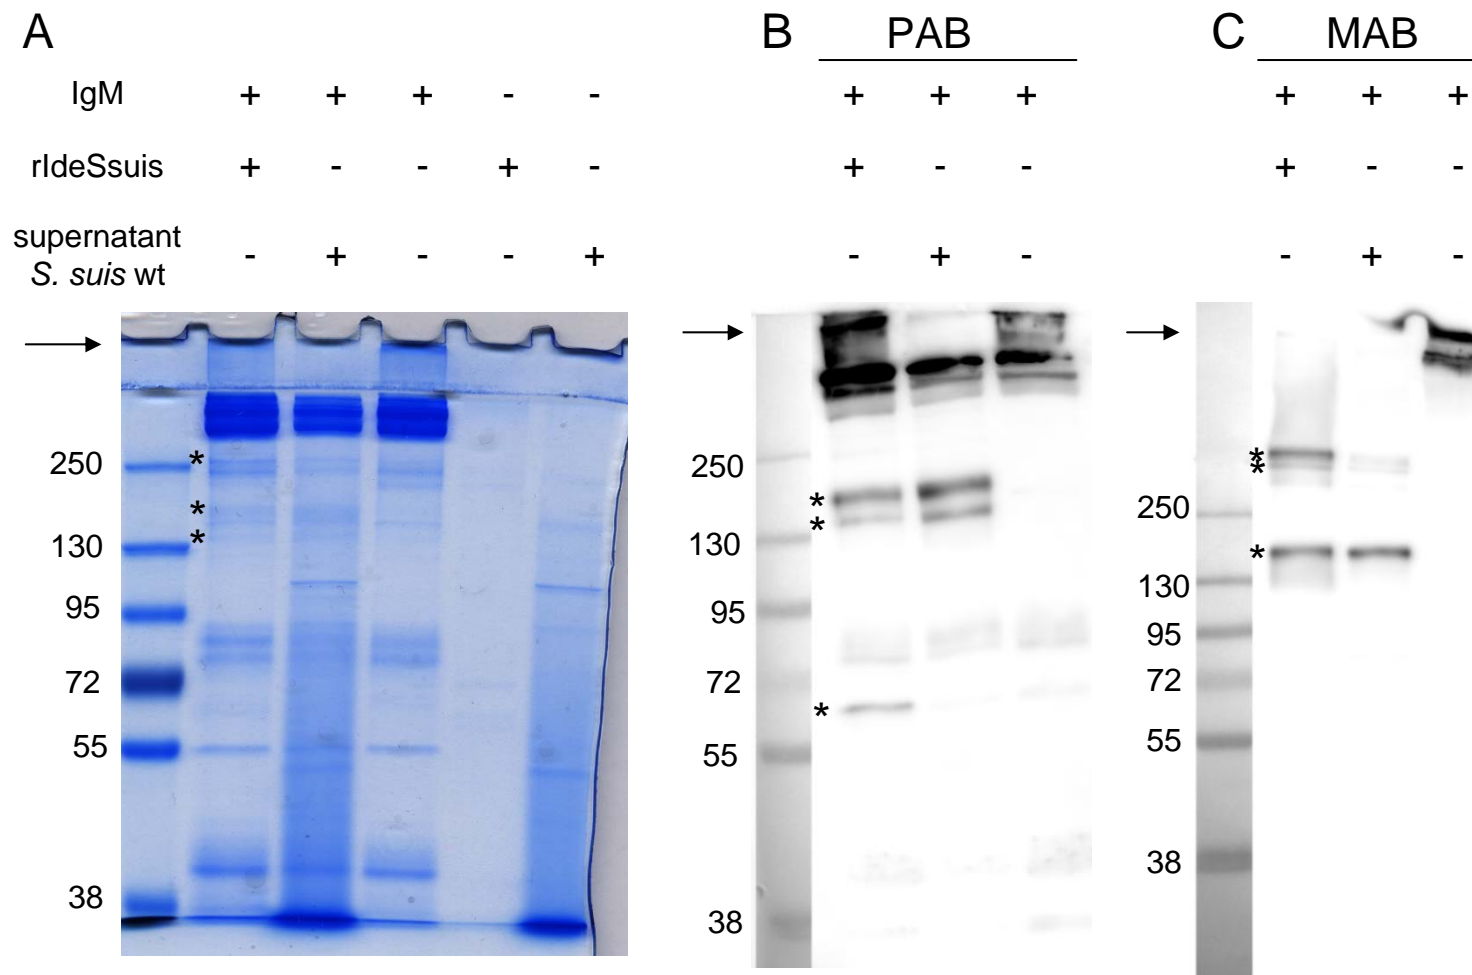

**Fig. S6.** Cleavage of purified porcine IgM by rldeSsuis and supernatant of *S. suis* serotype 2 (strain 10, wt). A. Colloidal Coomassie stained 8% gel of purified porcine IgM incubated as indicated with rldeSsuis or purified 24 fold concentrated supernatant of *S. suis* wt (strain 10). B and C. Western blot analysis of purified IgM cleaved with rldeSsuis or supernatant of *S. suis* wt as indicated (8% SDS-PAGE). Western blot analysis was conducted with a PAB (B) or MAB (C) against porcine IgM. The position of the porcine IgM multimer is marked with an arrow and the cleavage products of porcine IgM are indicated by asterisks on the left side for the first positive lane. The marker bands are shown on the left side (sizes in kDa).

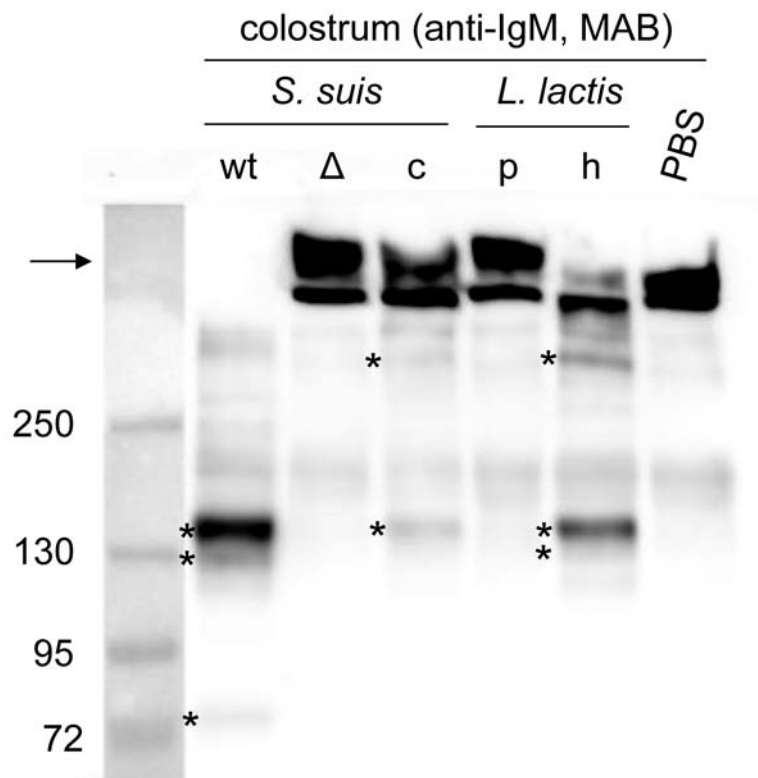

**Fig. S7** IdeSsuis in culture supernatants cleaves IgM in colostrum. Anti-IgM Western blot analysis was carried out with diluted colostrum incubated with the 24 fold concentrated supernatants of *S. suis* strain 10 (wt), 10 $\Delta$ ideSsuis ( $\Delta$ ) and 10 $\Delta$ ideSsuis pGA14ideSsuis (c) or with the 6 fold concentrated supernatants of *L. lactis* pOri23 (p) and *L. lactis* pOriideSsuis (h) as well as with PBS as control. The position of the porcine IgM multimer is marked with an arrow and the cleavage products of porcine IgM are indicated by asterisks on the left side. The marker bands are shown on the left side (sizes in kDa).

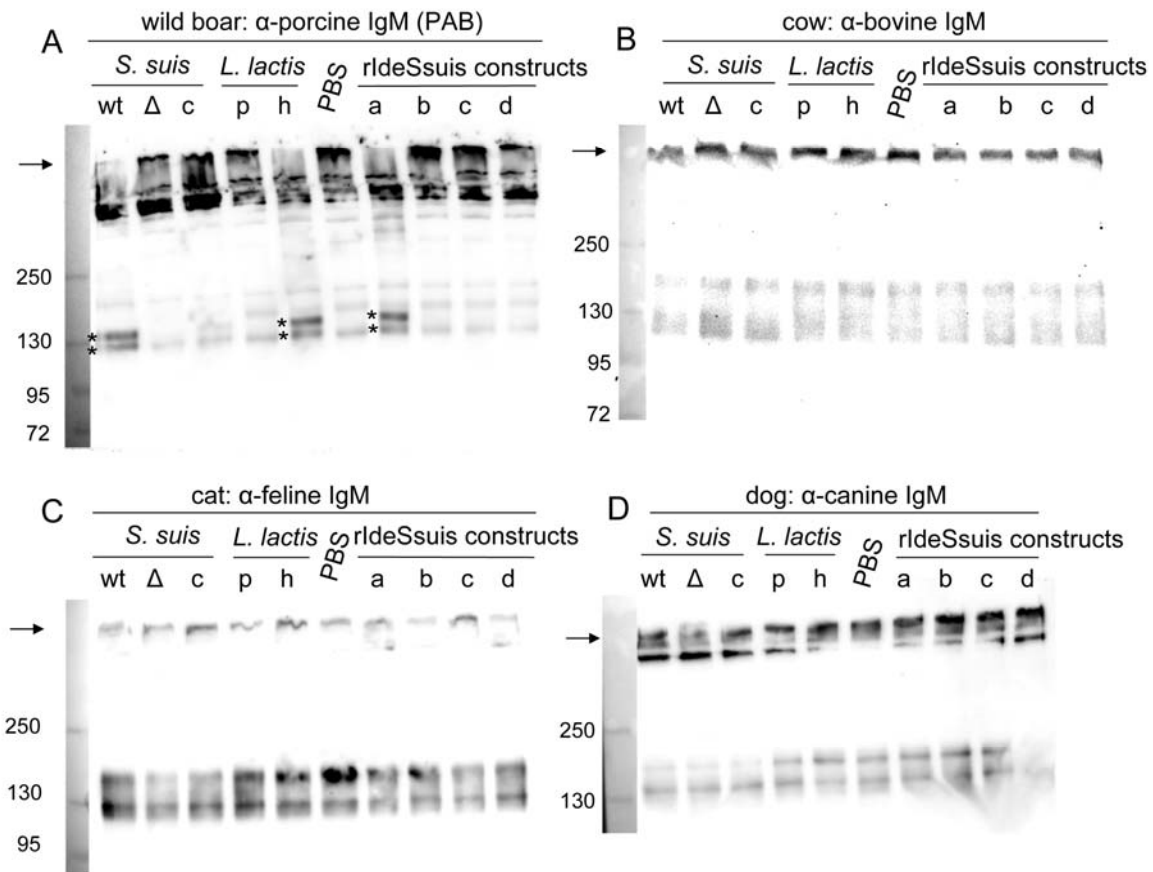

**Fig. S8** IdeSsuis in culture supernatants and rIdeSsuis cleave IgM from wild boars (A) but not bovine (B), feline (C) or canine (D) IgM. Anti-IgM Western blot analysis of diluted serum from respective animals incubated with the 24 fold concentrated supernatants of *S. suis* strain 10 (wt), 10 $\Delta$ ideSsuis ( $\Delta$ ) and 10 $\Delta$ ideSsuis pGA14ideSsuis (c) as well as with the 6 fold concentrated supernatants of *L. lactis* pOri23 (p) and *L. lactis* pOriideSsuis (h) and with rIdeSsuis (a), rIdeSsuis\_ homologue (b), rIdeSsuis\_L\_domain (c) and rIdeSsuis\_C\_domain (d). Detection of IgM was conducted with PABs against IgM of the different species tested (Supplementary Table 2). The final dilution of serum was 1:100 in all samples. The position of the IgM multimers are marked with arrows and the cleavage products of porcine IgM are indicated by asterisks on the left side. The marker bands are shown on the left side (sizes in kDa).

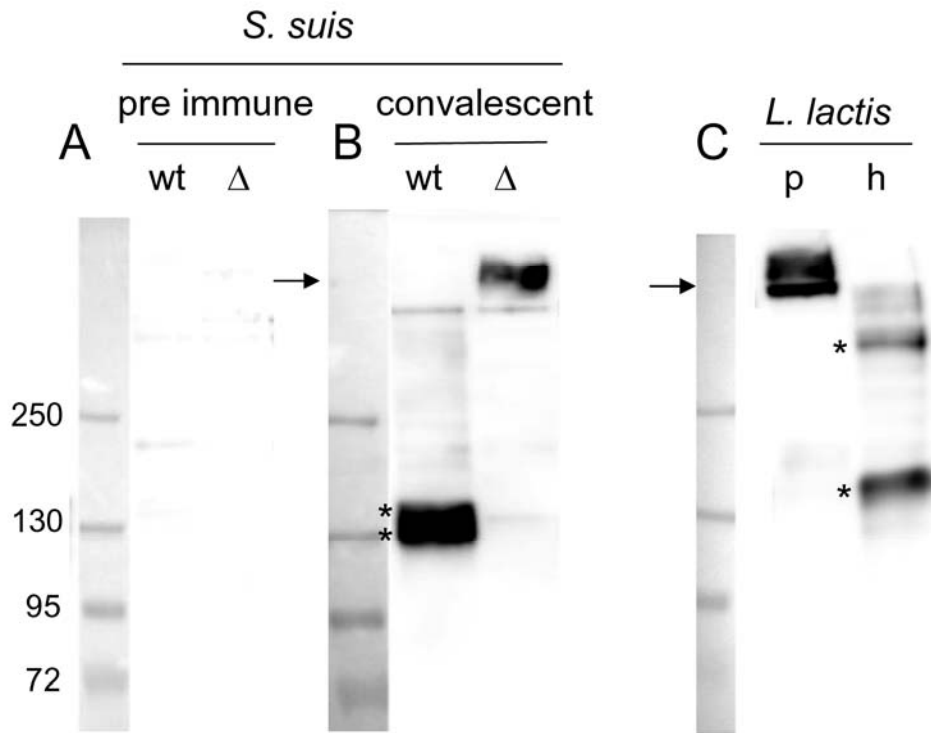

**Fig. S9** IdeS<sub>suis</sub> cleaves IgM bound to the bacterial surface. (A-C) Anti-IgM Western blot analysis (MAB) of culture supernatants of *S. suis* (A, B) and *L. lactis* (C) after opsonization with pre-immune (A), convalescent (B) and anti *L. lactis* hyper-immune (C) serum, respectively, and subsequent incubation of *S. suis* (A, B) strain 10 (wt) and 10 $\Delta$ ideS<sub>suis</sub> ( $\Delta$ ) as well as *L. lactis* (C) pOri23 (p) and pOriideS<sub>suis</sub> (h) for 2.5 h. The position of the high molecular weight porcine IgM multimer is marked with an arrow and the cleavage products of porcine IgM are indicated by asterisks. The marker bands are shown on the left side (sizes in kDa).

**Table S1.** Oligonucleotide primer sequences used in this study.

| primer                | sequence                       | position <sup>a</sup> |
|-----------------------|--------------------------------|-----------------------|
| ideSsuispostSSBamHI   | TGCGGATCCAGTTGTTACAGGAGTGAAT   | 101 to120             |
| ideSsuisterPstI       | AACCTGCAGACGATACTTCTTTTACTTA   | 3420 to 3439          |
| ideSsuis_L_domain_rev | TAACTGCAGCTAAAAATTCGATTTGTCAG  | 937 to 956            |
| ideSsuis_hom_rev      | GTTCTGCAGGCTTTTGCAAGCGGATTGAA  | 1282 to 1302          |
| ideSsuisCfor_BamHI    | GAAGAGGATCCCAATCCGCTTGCAAAAG   | 1284 to1300           |
| ideSsuisBamHIforL     | ATAGGATCCTAAACGGAGGAAAGATGAAC  | - 14 to 6             |
| preProldeSsuisPstI    | CTTCTGCAGTAAAAGACGCATG         | - 504 to - 483        |
| postSSideSuisBamHI    | ATTGGATCCTGTAACAACGTATCGGC     | 94 to 114             |
| preEndideSsuisBamHI   | TAAGGGATCCTCAAGACAGATTATGGGAGT | 3346 to 3365          |
| postEndideSsuisEcoRI  | AACGGAATTCTATACTTCAACTTATTCAC  | 3926 to 3945          |
| ideSsuismid_for       | GAAATGCTTTGGCACCAGAT           | 1538 to 1557          |
| ideSsuismid_rev2      | CAACCGCCTCCACTCTATCT           | 1983 to 2002          |
| pSET5_for             | TACCGGGTTGGA CTCAAGAC          |                       |
| pSET5_rev             | GCTTCCTCGCTCACTGACTC           |                       |
| ideSsuis_SacI_for     | CAGGAGCTCTTGGACCTTTTTGTAGTAAT  | - 148 to -128         |
| ideSsuis_SacI_rev     | GAACGAGCTCGCTTATTTCTATCTAGAATA | 3632 to 3651          |

a. Numbers indicate the location of the oligonucleotide primer with regard to the initiation ATG codon. The gene *ideSsuis* ends at position 3426.

**Table S2.** Antibodies used in Western blot analysis.

| detection of        | first antibody                                                      |                     |                          |          | second antibody                                  |                     |                          |          |
|---------------------|---------------------------------------------------------------------|---------------------|--------------------------|----------|--------------------------------------------------|---------------------|--------------------------|----------|
|                     | specificity (manufacturer)                                          | source <sup>a</sup> | conjugation <sup>b</sup> | dilution | specificity (manufacturer)                       | source <sup>a</sup> | conjugation <sup>b</sup> | dilution |
| His-tagged proteins | (His) <sub>n</sub> (34660, Qiagen, Hilden, Germany)                 | mouse MAB           |                          | 1:1000   | mouse IgG (GE Healthcare, Freiburg, Germany)     | sheep               | POD                      | 1:10000  |
| IdeSsuis            | rIdeSsuis                                                           | rabbit PAB          | -                        | 1:1000   | rabbit IgG (GE Healthcare)                       | donkey              | POD                      | 1:10000  |
| IdeSsuis            | rIdeSsuis_homologue                                                 | rabbit PAB          | -                        | 1:1000   | rabbit IgG (GE Healthcare)                       | donkey              | POD                      | 1:10000  |
| IdeSsuis            | rIdeSsuis_C_domain                                                  | rabbit PAB          | -                        | 1:1000   | rabbit IgG (GE Healthcare)                       | donkey              | POD                      | 1:10000  |
| Suilysin            | rSuilysin <sup>c</sup>                                              | rabbit PAB          | -                        | 1:1000   | rabbit IgG (GE Healthcare)                       | donkey              | POD                      | 1:10000  |
| porcine IgM         | porcine $\mu$ chain (LS-C59959, Lifespan Biosciences, Seattle, USA) | rabbit PAB          | POD                      | 1:2000   |                                                  |                     |                          |          |
| porcine IgM         | porcine IgM (MCA637, Serotec, Duesseldorf, Germany)                 | mouse MAB           | -                        | 1:250    | mouse IgG (GE Healthcare)                        | sheep               | POD                      | 1:10000  |
| porcine IgM         | porcine IgM (A100-100A, Bethyl Laboratories, Inc, Montgomery, USA)  | goat PAB            | -                        | 1:8000   | goat IgG (Jackson Laboratories, Bar Harbor, USA) | rabbit              | POD                      | 1:10000  |
| porcine IgG         | porcine IgG“1“ (MCA635, Serotec)                                    | mouse MAB           | -                        | 1:10000  | anti-mouse IgG (Dianova, Hamburg, Germany)       | sheep               | POD                      | 1:5000   |
| porcine IgG         | porcine IgG“2“ (MCA636, Serotec)                                    | mouse MAB           | -                        | 1:10000  | mouse IgG (Dianova)                              | sheep               | POD                      | 1:5000   |
| porcine IgA         | porcine IgA, (PA1-84625, Thermo Fisher, Bonn, Germany)              | goat PAB            | POD                      | 1:6000   |                                                  |                     |                          |          |
| human IgM           | human $\mu$ chain (A0420, Sigma-Aldrich, Taufkirchen, Germany)      | goat PAB            | POD                      | 1:20000  |                                                  |                     |                          |          |



| detection of | first antibody                                        |                     |                          |          | second antibody                                                                                   |                     |                          |                    |
|--------------|-------------------------------------------------------|---------------------|--------------------------|----------|---------------------------------------------------------------------------------------------------|---------------------|--------------------------|--------------------|
|              | specificity (manufacturer)                            | source <sup>a</sup> | conjugation <sup>b</sup> | dilution | specificity (manufacturer)                                                                        | source <sup>a</sup> | conjugation <sup>b</sup> | dilution           |
| murine IgM   | murine $\mu$ chain (115-035-075, Dianova)             | goat PAB            | POD                      | 1:10000  |                                                                                                   |                     |                          |                    |
| equine IgM   | equine $\mu$ chain (A70-114A, Bethyl Laboratories)    | goat PAB            | -                        | 1:10000  | goat IgG (Jackson Laboratories)                                                                   | rabbit              | POD                      | 1:10000            |
| canine IgM   | canine IgM (A40116A, Bethyl Laboratories)             | goat PAB            | -                        | 1:8000   | goat IgG (Jackson Laboratories)                                                                   | rabbit              | POD                      | 1:10000            |
| feline IgM   | feline IgM (A20-100A, Bethyl Laboratories)            | goat PAB            | -                        | 1:8000   | goat IgG (Jackson Laboratories)                                                                   | rabbit              | POD                      | 1:10000            |
| bovine IgM   | bovine IgM (A10-101A, Bethyl Laboratories)            | sheep PAB           | -                        | 1:8000   | sheep biotin (Miltenyi Biotec, Bergisch Gladbach, Germany), biotin <sup>d</sup> (Miltenyi Biotec) | rabbit<br>mouse     | biotin, AP               | 1:5000,<br>1:10000 |
| warthog IgM  | porcine $\mu$ chain (LS-C59959, Lifespan Biosciences) | rabbit PAB          | POD                      | 1:2000   |                                                                                                   |                     |                          |                    |
| warthog IgM  | porcine IgM (MCA637, Serotec)                         | mouse MAB           | -                        | 1:250    | mouse IgG (GE Healthcare)                                                                         | sheep               | POD                      | 1:10000            |

a. MAB = monoclonal antibody; PAB = polyclonal antibody

b. POD = peroxidase; AP = alkaline phosphatase

c. hyper-immune serum against suilysin was raised in a previous study (Kock *et al.* 2009).

d. third antibody
